# Supplementary material for: Super-stretchable and extreme temperature-tolerant supramolecular-polymer double-network eutectogels with ultrafast in situ adhesion and flexible electrochromic behaviour
Source: Royal Society of Chemistry journal article supplement (doi:10.1039/d1mh00725d), 2021-01-01
Supplement: d1mh00725d2.pdf [file d1mh00725d2.pdf]

**Table S10.** Cartesian coordinates (Angstroms) of the optimized (BGA-12)<sub>6</sub>/PHEAA SP-DN eutectogels.

| Atom  | X       | Y       | Z       | Atom   | X       | Y       | Z      |
|-------|---------|---------|---------|--------|---------|---------|--------|
| C(1)  | 14.7648 | 0.5923  | -3.9103 | H(350) | 11.4212 | -2.9316 | 2.4013 |
| O(2)  | 14.0835 | -0.4208 | -3.9618 | H(351) | 11.5649 | -1.747  | 1.0598 |
| N(3)  | 14.2708 | 1.8013  | -4.3074 | C(352) | 10.2643 | -1.1106 | 2.7191 |
| H(4)  | 14.7681 | 2.6831  | -4.1506 | H(353) | 10.2737 | -1.1594 | 3.8263 |
| C(5)  | 12.9102 | 1.8704  | -4.8463 | H(354) | 10.3035 | -0.0331 | 2.4725 |
| H(6)  | 12.7698 | 1.0482  | -5.5893 | C(355) | 9.0094  | -1.7764 | 2.1621 |
| H(7)  | 12.794  | 2.8327  | -5.3897 | H(356) | 8.9539  | -1.6299 | 1.0665 |
| C(8)  | 11.8568 | 1.7442  | -3.7295 | H(357) | 9.0674  | -2.8732 | 2.3237 |
| H(9)  | 12.0264 | 0.8103  | -3.1558 | C(358) | 7.7466  | -1.2359 | 2.8373 |
| H(10) | 11.9779 | 2.5649  | -2.9959 | H(359) | 7.6689  | -0.1414 | 2.7018 |
| C(11) | 10.4605 | 1.7401  | -4.3547 | H(360) | 7.7981  | -1.3986 | 3.9299 |
| H(12) | 10.3507 | 2.587   | -5.0581 | C(361) | 6.5223  | -1.9425 | 2.2506 |
| H(13) | 10.3267 | 0.8266  | -4.9672 | H(362) | 6.4566  | -1.739  | 1.1637 |
| C(14) | 9.3701  | 1.8083  | -3.2819 | H(363) | 6.637   | -3.0401 | 2.3508 |
| H(15) | 9.5556  | 2.6612  | -2.5999 | C(364) | 5.2346  | -1.4989 | 2.9477 |
| H(16) | 9.3985  | 0.8978  | -2.6512 | H(365) | 5.1508  | -0.3959 | 2.9428 |
| C(17) | 7.99    | 1.9494  | -3.9355 | H(366) | 5.2547  | -1.7917 | 4.0132 |
| H(18) | 7.9682  | 2.8376  | -4.5936 | C(367) | 4.0306  | -2.1291 | 2.2428 |
| H(19) | 7.7902  | 1.0834  | -4.5938 | H(368) | 4.0022  | -1.8016 | 1.1846 |
| C(20) | 6.8993  | 2.0592  | -2.8668 | H(369) | 4.1403  | -3.231  | 2.2183 |
| H(21) | 7.1571  | 2.8555  | -2.14   | C(370) | 2.723   | -1.7575 | 2.9454 |
| H(22) | 6.846   | 1.1184  | -2.2831 | H(371) | 2.6736  | -0.6663 | 3.1201 |
| C(23) | 5.5359  | 2.3593  | -3.4993 | H(372) | 2.6846  | -2.2209 | 3.9482 |
| H(24) | 5.5734  | 3.3141  | -4.0546 | C(373) | 1.5319  | -2.2147 | 2.0992 |
| H(25) | 5.28    | 1.5856  | -4.2465 | H(374) | 1.5449  | -1.702  | 1.1174 |
| C(26) | 4.4616  | 2.4179  | -2.4099 | H(375) | 1.6159  | -3.2968 | 1.8764 |
| H(27) | 4.7764  | 3.1123  | -1.6052 | C(376) | 0.2128  | -1.9412 | 2.8268 |
| H(28) | 4.3611  | 1.4222  | -1.9316 | H(377) | 0.1822  | -0.9044 | 3.21   |
| C(29) | 3.108   | 2.864   | -2.9725 | H(378) | 0.1394  | -2.5912 | 3.7195 |
| H(30) | 3.1811  | 3.8852  | -3.3876 | C(379) | -0.9662 | -2.1937 | 1.886  |
| H(31) | 2.8066  | 2.2153  | -3.8157 | H(380) | -1.0338 | -1.4071 | 1.1139 |
| C(32) | 2.0571  | 2.8078  | -1.8596 | H(381) | -0.8239 | -3.1461 | 1.3331 |
| H(33) | 2.4188  | 3.3634  | -0.9706 | C(382) | -2.2685 | -2.2601 | 2.7013 |
| H(34) | 1.9244  | 1.7541  | -1.5353 | H(383) | -2.3864 | -1.3456 | 3.3245 |
| C(35) | 0.7164  | 3.3814  | -2.3156 | H(384) | -2.2286 | -3.1327 | 3.3949 |
| H(36) | 0.8129  | 4.4426  | -2.6024 | N(385) | -3.4418 | -2.3841 | 1.8291 |
| H(37) | 0.3463  | 2.8542  | -3.2182 | C(386) | -3.6721 | -3.5755 | 1.2039 |
| C(38) | -0.3034 | 3.2162  | -1.1744 | H(387) | -4.1437 | -1.6425 | 1.9003 |
| H(39) | 0.0704  | 3.6886  | -0.2383 | O(388) | -2.8288 | -4.4524 | 1.1291 |
| H(40) | -0.4493 | 2.1247  | -0.9708 | C(389) | -5.0458 | -3.7881 | 0.5544 |
| N(41) | -1.5838 | 3.8278  | -1.529  | C(390) | -5.5672 | -5.149  | 1.051  |
| C(42) | -2.4478 | 3.1609  | -2.3371 | H(391) | -4.9763 | -3.7435 | -0.561 |
| H(43) | -1.8631 | 4.6777  | -1.0271 | C(392) | -7.0172 | -5.4815 | 0.6186 |
| O(44) | -2.2162 | 2.0361  | -2.7636 | H(393) | -4.874  | -5.9569 | 0.7042 |
| C(45) | -3.7451 | 3.8728  | -2.7272 | C(394) | -7.9826 | -5.5706 | 1.824  |
| C(46) | -4.9176 | 3.0935  | -2.1003 | H(395) | -7.041  | -6.4363 | 0.0323 |
| H(47) | -3.8245 | 3.9304  | -3.8386 | H(396) | -7.8332 | -4.737  | 2.5462 |

|               |         |         |         |               |          |         |         |
|---------------|---------|---------|---------|---------------|----------|---------|---------|
| <b>C(48)</b>  | -6.2504 | 3.4134  | -2.8059 | <b>C(397)</b> | -9.4567  | -5.6642 | 1.4145  |
| <b>H(49)</b>  | -4.7169 | 1.9946  | -2.1121 | <b>H(398)</b> | -9.798   | -6.7156 | 1.3341  |
| <b>C(50)</b>  | -7.4393 | 2.8594  | -1.9904 | <b>H(399)</b> | -9.6965  | -5.1648 | 0.4606  |
| <b>H(51)</b>  | -6.244  | 3       | -3.8414 | <b>O(400)</b> | -10.2187 | -5.0974 | 2.4679  |
| <b>H(52)</b>  | -7.5247 | 3.3874  | -1.0105 | <b>H(401)</b> | -10.5589 | -4.203  | 2.2126  |
| <b>C(53)</b>  | -8.7625 | 2.9399  | -2.7544 | <b>O(402)</b> | -7.587   | -6.769  | 2.4796  |
| <b>H(54)</b>  | -8.8068 | 2.241   | -3.6084 | <b>H(403)</b> | -8.2205  | -6.9865 | 3.1913  |
| <b>H(55)</b>  | -8.967  | 3.9708  | -3.1071 | <b>O(404)</b> | -7.5125  | -4.5535 | -0.3024 |
| <b>O(56)</b>  | -9.8301 | 2.6683  | -1.8739 | <b>H(405)</b> | -7.4469  | -3.62   | 0.0117  |
| <b>H(57)</b>  | -9.7336 | 1.7944  | -1.4385 | <b>O(406)</b> | -5.4613  | -5.0446 | 2.4558  |
| <b>O(58)</b>  | -7.1182 | 1.5028  | -1.7858 | <b>H(407)</b> | -5.7018  | -5.9001 | 2.8816  |
| <b>H(59)</b>  | -7.5842 | 1.1227  | -0.9937 | <b>O(408)</b> | -5.9037  | -2.7215 | 0.8825  |
| <b>O(60)</b>  | -6.5069 | 4.79    | -2.9336 | <b>H(409)</b> | -6.3482  | -2.8602 | 1.7573  |
| <b>H(61)</b>  | -5.7259 | 5.3151  | -2.6311 | <b>C(410)</b> | 14.3192  | -0.9929 | 4.6025  |
| <b>O(62)</b>  | -4.9338 | 3.5115  | -0.754  | <b>C(411)</b> | 15.6378  | -1.2489 | 3.8392  |
| <b>H(63)</b>  | -5.5982 | 2.9639  | -0.2436 | <b>H(412)</b> | 14.4129  | -1.3049 | 5.6736  |
| <b>O(64)</b>  | -3.7571 | 5.2113  | -2.3142 | <b>C(413)</b> | 16.8417  | -0.9398 | 4.752   |
| <b>H(65)</b>  | -3.6423 | 5.2595  | -1.3201 | <b>H(414)</b> | 15.6901  | -2.3007 | 3.465   |
| <b>C(66)</b>  | 16.1949 | 0.5982  | -3.3583 | <b>C(415)</b> | 18.1633  | -0.8374 | 3.9618  |
| <b>C(67)</b>  | 16.8721 | -0.7778 | -3.469  | <b>H(416)</b> | 16.9139  | -1.7051 | 5.5597  |
| <b>H(68)</b>  | 16.1692 | 0.9607  | -2.3007 | <b>H(417)</b> | 18.0508  | -0.1481 | 3.09    |
| <b>C(69)</b>  | 18.1515 | -0.9066 | -2.5976 | <b>C(418)</b> | 19.3261  | -0.3937 | 4.8653  |
| <b>H(70)</b>  | 16.1468 | -1.5894 | -3.1917 | <b>H(419)</b> | 20.3089  | -0.6394 | 4.4179  |
| <b>C(71)</b>  | 19.4016 | -1.3193 | -3.407  | <b>H(420)</b> | 19.2638  | -0.817  | 5.8819  |
| <b>H(72)</b>  | 17.9609 | -1.6216 | -1.7619 | <b>O(421)</b> | 19.3278  | 1.0185  | 4.9437  |
| <b>H(73)</b>  | 19.5771 | -0.6097 | -4.2484 | <b>H(422)</b> | 18.4589  | 1.3191  | 5.3154  |
| <b>C(74)</b>  | 20.6538 | -1.4365 | -2.5166 | <b>O(423)</b> | 14.0428  | 0.3775  | 4.6943  |
| <b>H(75)</b>  | 20.765  | -0.5823 | -1.8309 | <b>H(424)</b> | 13.6781  | 0.7496  | 3.8448  |
| <b>H(76)</b>  | 21.5653 | -1.5374 | -3.1378 | <b>O(425)</b> | 15.6152  | -0.3629 | 2.7441  |
| <b>O(77)</b>  | 20.5814 | -2.6621 | -1.8215 | <b>H(426)</b> | 16.1526  | -0.7288 | 1.999   |
| <b>H(78)</b>  | 20.4129 | -2.5449 | -0.8607 | <b>O(427)</b> | 16.7227  | 0.3001  | 5.414   |
| <b>O(79)</b>  | 16.9114 | 1.5779  | -4.0858 | <b>H(428)</b> | 15.8529  | 0.7291  | 5.2001  |
| <b>H(80)</b>  | 17.2656 | 1.1858  | -4.9241 | <b>O(429)</b> | 18.4633  | -2.0734 | 3.3657  |
| <b>O(81)</b>  | 17.1639 | -0.8903 | -4.8459 | <b>H(430)</b> | 18.6851  | -2.7935 | 4.0138  |
| <b>H(82)</b>  | 17.5772 | -1.7637 | -5.0409 | <b>C(431)</b> | 12.4106  | -5.9601 | 2.1108  |
| <b>O(83)</b>  | 18.504  | 0.3517  | -2.0512 | <b>O(432)</b> | 12.2319  | -7.1258 | 2.4186  |
| <b>H(84)</b>  | 18.2699 | 0.3761  | -1.0921 | <b>N(433)</b> | 11.6962  | -5.3087 | 1.1536  |
| <b>O(85)</b>  | 19.143  | -2.5498 | -4.0432 | <b>H(434)</b> | 11.9468  | -4.356  | 0.8571  |
| <b>H(86)</b>  | 19.3403 | -3.3005 | -3.4378 | <b>C(435)</b> | 10.6165  | -5.947  | 0.3956  |
| <b>C(87)</b>  | 13.4857 | -2.4297 | -0.821  | <b>H(436)</b> | 10.5108  | -7.0163 | 0.686   |
| <b>O(88)</b>  | 12.8392 | -3.3738 | -0.3653 | <b>H(437)</b> | 10.8746  | -5.9229 | -0.6874 |
| <b>N(89)</b>  | 13.0437 | -1.665  | -1.8381 | <b>C(438)</b> | 9.3052   | -5.1792 | 0.661   |
| <b>H(90)</b>  | 13.6809 | -0.992  | -2.2962 | <b>H(439)</b> | 8.975    | -5.3718 | 1.6999  |
| <b>C(91)</b>  | 11.8117 | -2.0278 | -2.5493 | <b>H(440)</b> | 9.4909   | -4.089  | 0.595   |
| <b>H(92)</b>  | 11.8303 | -3.1096 | -2.8163 | <b>C(441)</b> | 8.2115   | -5.5765 | -0.3355 |
| <b>H(93)</b>  | 11.7794 | -1.4553 | -3.5044 | <b>H(442)</b> | 8.4498   | -5.1781 | -1.3392 |
| <b>C(94)</b>  | 10.58   | -1.7243 | -1.6773 | <b>H(443)</b> | 8.1688   | -6.6758 | -0.4461 |
| <b>H(95)</b>  | 10.5761 | -2.4025 | -0.7991 | <b>C(444)</b> | 6.8496   | -5.0477 | 0.137   |
| <b>H(96)</b>  | 10.6477 | -0.698  | -1.2744 | <b>H(445)</b> | 6.9313   | -3.9763 | 0.4025  |
| <b>C(97)</b>  | 9.2934  | -1.901  | -2.4858 | <b>H(446)</b> | 6.5513   | -5.5701 | 1.0659  |
| <b>H(98)</b>  | 9.2804  | -1.204  | -3.3452 | <b>C(447)</b> | 5.769    | -5.2285 | -0.937  |
| <b>H(99)</b>  | 9.2517  | -2.9166 | -2.9223 | <b>H(448)</b> | 5.9614   | -4.5458 | -1.7855 |
| <b>C(100)</b> | 8.0691  | -1.667  | -1.5927 | <b>H(449)</b> | 5.8115   | -6.2506 | -1.3558 |
| <b>H(101)</b> | 8.1682  | -0.7074 | -1.0508 | <b>C(450)</b> | 4.3758   | -4.9652 | -0.349  |

|               |          |         |         |               |          |         |         |
|---------------|----------|---------|---------|---------------|----------|---------|---------|
| <b>H(102)</b> | 8.0155   | -2.4572 | -0.8174 | <b>H(451)</b> | 4.3634   | -3.9943 | 0.1808  |
| <b>C(103)</b> | 6.7806   | -1.6641 | -2.4217 | <b>H(452)</b> | 4.1445   | -5.731  | 0.4155  |
| <b>H(104)</b> | 6.8248   | -0.8712 | -3.1923 | <b>C(453)</b> | 3.2977   | -4.9722 | -1.4408 |
| <b>H(105)</b> | 6.6826   | -2.6148 | -2.9779 | <b>H(454)</b> | 3.4282   | -4.1006 | -2.1089 |
| <b>C(106)</b> | 5.5592   | -1.4571 | -1.5186 | <b>H(455)</b> | 3.4132   | -5.8645 | -2.0831 |
| <b>H(107)</b> | 5.6932   | -0.5559 | -0.8916 | <b>C(456)</b> | 1.8951   | -4.9582 | -0.8184 |
| <b>H(108)</b> | 5.4641   | -2.3093 | -0.8166 | <b>H(457)</b> | 1.7903   | -4.103  | -0.1252 |
| <b>C(109)</b> | 4.2833   | -1.327  | -2.3565 | <b>H(458)</b> | 1.7552   | -5.8655 | -0.2002 |
| <b>H(110)</b> | 4.3508   | -0.4417 | -3.0171 | <b>C(459)</b> | 0.8048   | -4.8866 | -1.8979 |
| <b>H(111)</b> | 4.1847   | -2.1959 | -3.0342 | <b>H(460)</b> | 0.7484   | -3.8643 | -2.3154 |
| <b>C(112)</b> | 3.0475   | -1.2243 | -1.4554 | <b>H(461)</b> | 1.0617   | -5.5467 | -2.7464 |
| <b>H(113)</b> | 3.161    | -0.3884 | -0.7409 | <b>C(462)</b> | -0.5524  | -5.2972 | -1.3151 |
| <b>H(114)</b> | 2.9523   | -2.1426 | -0.842  | <b>H(463)</b> | -0.8064  | -4.6646 | -0.4387 |
| <b>C(115)</b> | 1.785    | -1.029  | -2.3016 | <b>H(464)</b> | -0.4944  | -6.3311 | -0.9251 |
| <b>H(116)</b> | 1.8499   | -0.0807 | -2.8682 | <b>C(465)</b> | -1.6718  | -5.191  | -2.3583 |
| <b>H(117)</b> | 1.7124   | -1.8279 | -3.064  | <b>H(466)</b> | -1.8884  | -4.1259 | -2.5706 |
| <b>C(118)</b> | 0.5291   | -1.0347 | -1.4226 | <b>H(467)</b> | -1.3677  | -5.6368 | -3.3195 |
| <b>H(119)</b> | 0.6046   | -0.254  | -0.6435 | <b>C(468)</b> | -2.9294  | -5.8998 | -1.8196 |
| <b>H(120)</b> | 0.4443   | -2.0016 | -0.8854 | <b>H(469)</b> | -3.0336  | -5.6957 | -0.7231 |
| <b>C(121)</b> | -0.7142  | -0.8074 | -2.283  | <b>H(470)</b> | -2.8264  | -7.0014 | -1.9349 |
| <b>H(122)</b> | -0.6183  | 0.1319  | -2.8649 | <b>N(471)</b> | -4.1576  | -5.4319 | -2.4685 |
| <b>H(123)</b> | -0.8211  | -1.6168 | -3.0298 | <b>C(472)</b> | -4.9231  | -6.2663 | -3.2344 |
| <b>C(124)</b> | -1.9756  | -0.7471 | -1.4061 | <b>H(473)</b> | -4.3235  | -4.4113 | -2.4672 |
| <b>H(125)</b> | -1.888   | 0.0674  | -0.6514 | <b>O(474)</b> | -4.6045  | -7.398  | -3.5452 |
| <b>H(126)</b> | -2.1133  | -1.7048 | -0.8475 | <b>C(475)</b> | -6.2648  | -5.6652 | -3.6918 |
| <b>N(127)</b> | -3.1589  | -0.464  | -2.225  | <b>C(476)</b> | -7.4014  | -6.6969 | -3.6005 |
| <b>C(128)</b> | -3.9413  | -1.4821 | -2.6673 | <b>H(477)</b> | -6.174   | -5.2663 | -4.7297 |
| <b>H(129)</b> | -3.1858  | 0.4665  | -2.6802 | <b>C(478)</b> | -8.7993  | -6.0585 | -3.8694 |
| <b>O(130)</b> | -3.771   | -2.6508 | -2.3383 | <b>H(479)</b> | -7.2106  | -7.532  | -4.3123 |
| <b>C(131)</b> | -5.1578  | -1.1119 | -3.5308 | <b>C(480)</b> | -9.6747  | -6.0294 | -2.5936 |
| <b>C(132)</b> | -6.3846  | -1.6484 | -2.776  | <b>H(481)</b> | -9.3201  | -6.6041 | -4.6875 |
| <b>H(133)</b> | -5.0658  | -1.5393 | -4.5521 | <b>H(482)</b> | -9.0823  | -5.712  | -1.697  |
| <b>C(134)</b> | -7.7307  | -1.389  | -3.4659 | <b>C(483)</b> | -10.9135 | -5.127  | -2.7081 |
| <b>H(135)</b> | -6.2605  | -2.7472 | -2.6015 | <b>H(484)</b> | -11.8408 | -5.7211 | -2.8058 |
| <b>C(136)</b> | -8.8846  | -1.6373 | -2.4606 | <b>H(485)</b> | -10.8695 | -4.3879 | -3.5251 |
| <b>H(137)</b> | -7.8296  | -2.03   | -4.3721 | <b>O(486)</b> | -10.9213 | -4.4364 | -1.4707 |
| <b>H(138)</b> | -8.8362  | -0.9312 | -1.6009 | <b>H(487)</b> | -11.7025 | -3.8413 | -1.3566 |
| <b>C(139)</b> | -10.2391 | -1.5398 | -3.1683 | <b>O(488)</b> | -10.0855 | -7.3739 | -2.4255 |
| <b>H(140)</b> | -10.3956 | -2.3821 | -3.8696 | <b>H(489)</b> | -10.6013 | -7.4796 | -1.5888 |
| <b>H(141)</b> | -10.3494 | -0.5832 | -3.708  | <b>O(490)</b> | -8.6673  | -4.7632 | -4.387  |
| <b>O(142)</b> | -11.2776 | -1.7004 | -2.2287 | <b>H(491)</b> | -8.3568  | -4.1329 | -3.6751 |
| <b>H(143)</b> | -11.4088 | -0.8944 | -1.6783 | <b>O(492)</b> | -7.3154  | -7.2202 | -2.2937 |
| <b>O(144)</b> | -8.6402  | -2.9279 | -1.9607 | <b>H(493)</b> | -8.0542  | -7.8526 | -2.1324 |
| <b>H(145)</b> | -9.4838  | -3.4005 | -1.7202 | <b>O(494)</b> | -6.5424  | -4.5344 | -2.9204 |
| <b>O(146)</b> | -7.8721  | -0.0861 | -3.9568 | <b>H(495)</b> | -6.8609  | -4.7597 | -2.0034 |
| <b>H(147)</b> | -7.6241  | 0.5607  | -3.2464 | <b>C(496)</b> | 13.4268  | -5.105  | 2.8841  |
| <b>O(148)</b> | -6.3896  | -0.9904 | -1.5238 | <b>C(497)</b> | 14.7755  | -5.8347 | 3.0397  |
| <b>H(149)</b> | -6.1368  | -1.6245 | -0.8114 | <b>H(498)</b> | 12.9603  | -4.8674 | 3.8813  |
| <b>O(150)</b> | -5.1741  | 0.2754  | -3.7202 | <b>C(499)</b> | 15.5576  | -5.3884 | 4.305   |
| <b>H(151)</b> | -5.7539  | 0.6973  | -3.0368 | <b>H(500)</b> | 14.6197  | -6.9396 | 3.0781  |
| <b>C(152)</b> | 14.8298  | -2.0986 | -0.17   | <b>C(501)</b> | 17.0579  | -5.1575 | 4.0009  |
| <b>C(153)</b> | 15.7424  | -3.3252 | -0.375  | <b>H(502)</b> | 15.4227  | -6.1555 | 5.1032  |
| <b>H(154)</b> | 14.6732  | -1.8897 | 0.9199  | <b>H(503)</b> | 17.1848  | -4.3542 | 3.2316  |
| <b>C(155)</b> | 16.9325  | -3.3164 | 0.5986  | <b>C(504)</b> | 17.8377  | -4.8293 | 5.2783  |

|               |         |         |         |               |          |         |         |
|---------------|---------|---------|---------|---------------|----------|---------|---------|
| <b>H(156)</b> | 15.1687 | -4.278  | -0.2217 | <b>H(505)</b> | 18.0083  | -5.7149 | 5.9118  |
| <b>C(157)</b> | 18.1672 | -3.9991 | -0.0188 | <b>H(506)</b> | 17.3596  | -4.0346 | 5.8868  |
| <b>H(158)</b> | 16.6347 | -3.7873 | 1.5678  | <b>O(507)</b> | 19.0901  | -4.2601 | 4.9372  |
| <b>H(159)</b> | 18.4965 | -3.4524 | -0.9331 | <b>H(508)</b> | 19.6076  | -4.8789 | 4.3763  |
| <b>C(160)</b> | 19.3299 | -4.153  | 0.9764  | <b>O(509)</b> | 13.6386  | -3.8504 | 2.3075  |
| <b>H(161)</b> | 20.0979 | -4.8509 | 0.5903  | <b>H(510)</b> | 13.7364  | -3.9143 | 1.3223  |
| <b>H(162)</b> | 18.9947 | -4.504  | 1.967   | <b>O(511)</b> | 15.4802  | -5.5219 | 1.8608  |
| <b>O(163)</b> | 20.0123 | -2.9203 | 1.0776  | <b>H(512)</b> | 16.2448  | -6.128  | 1.7255  |
| <b>H(164)</b> | 19.6405 | -2.3911 | 1.8184  | <b>O(513)</b> | 15.1798  | -4.1758 | 4.8963  |
| <b>O(165)</b> | 15.3143 | -0.9386 | -0.7945 | <b>H(514)</b> | 14.2741  | -3.845  | 4.651   |
| <b>H(166)</b> | 16.1833 | -0.6861 | -0.3975 | <b>O(515)</b> | 17.6322  | -6.285  | 3.379   |
| <b>O(167)</b> | 16.1744 | -3.2717 | -1.7151 | <b>H(516)</b> | 17.5309  | -7.0938 | 3.9173  |
| <b>H(168)</b> | 16.4433 | -4.1714 | -2.0091 | <b>C(517)</b> | -10.6875 | 6.671   | -0.7727 |
| <b>O(169)</b> | 17.267  | -1.9654 | 0.8471  | <b>C(518)</b> | -12.0446 | 5.9639  | -0.6252 |
| <b>H(170)</b> | 17.7763 | -1.9196 | 1.6869  | <b>H(519)</b> | -9.8508  | 5.9454  | -0.6474 |
| <b>O(171)</b> | 17.7008 | -5.2848 | -0.389  | <b>H(520)</b> | -10.6046 | 7.0558  | -1.8111 |
| <b>H(172)</b> | 18.4167 | -5.8082 | -0.8021 | <b>C(521)</b> | -11.999  | 4.5934  | -1.321  |
| <b>C(173)</b> | 13.338  | 5.2366  | -2.3297 | <b>H(522)</b> | -12.8095 | 6.6226  | -1.1096 |
| <b>O(174)</b> | 12.9996 | 4.4019  | -1.4981 | <b>C(523)</b> | -13.3819 | 4.0624  | -1.7356 |
| <b>N(175)</b> | 12.5215 | 5.7375  | -3.2852 | <b>H(524)</b> | -11.3464 | 4.6516  | -2.2212 |
| <b>H(176)</b> | 12.9089 | 6.4332  | -3.9291 | <b>H(525)</b> | -11.5144 | 3.8503  | -0.6487 |
| <b>C(177)</b> | 11.1287 | 5.317   | -3.4495 | <b>C(526)</b> | -13.2455 | 2.7471  | -2.5239 |
| <b>H(178)</b> | 11.1016 | 4.2397  | -3.7429 | <b>C(527)</b> | -13.9279 | 1.5836  | -1.7936 |
| <b>H(179)</b> | 10.6876 | 5.8975  | -4.2901 | <b>H(528)</b> | -12.1721 | 2.5069  | -2.7024 |
| <b>C(180)</b> | 10.3075 | 5.5218  | -2.1647 | <b>H(529)</b> | -13.6757 | 2.8573  | -3.541  |
| <b>H(181)</b> | 10.5588 | 4.734   | -1.4257 | <b>C(530)</b> | -13.9839 | 0.3101  | -2.6462 |
| <b>H(182)</b> | 10.5815 | 6.4754  | -1.677  | <b>H(531)</b> | -14.9779 | 1.8831  | -1.5378 |
| <b>C(183)</b> | 8.815   | 5.497   | -2.4995 | <b>C(532)</b> | -14.7207 | -0.7949 | -1.8652 |
| <b>H(184)</b> | 8.546   | 6.39    | -3.0949 | <b>H(533)</b> | -14.5003 | 0.5099  | -3.6078 |
| <b>H(185)</b> | 8.575   | 4.6237  | -3.1385 | <b>H(534)</b> | -12.9603 | -0.0235 | -2.9129 |
| <b>C(186)</b> | 7.9687  | 5.4441  | -1.2225 | <b>C(535)</b> | -14.5977 | -2.1554 | -2.5532 |
| <b>H(187)</b> | 8.3035  | 6.2176  | -0.5067 | <b>C(536)</b> | -14.9644 | -3.3341 | -1.6262 |
| <b>H(188)</b> | 8.1144  | 4.4733  | -0.7098 | <b>H(537)</b> | -13.5468 | -2.2817 | -2.9037 |
| <b>C(189)</b> | 6.4893  | 5.6506  | -1.5658 | <b>H(538)</b> | -15.2351 | -2.182  | -3.4605 |
| <b>H(190)</b> | 6.3457  | 6.6484  | -2.0212 | <b>C(539)</b> | -14.4897 | -4.6467 | -2.2734 |
| <b>H(191)</b> | 6.169   | 4.9205  | -2.3349 | <b>H(540)</b> | -16.0726 | -3.3691 | -1.4867 |
| <b>C(192)</b> | 5.6105  | 5.5118  | -0.3185 | <b>C(541)</b> | -14.4405 | -5.8154 | -1.2825 |
| <b>H(193)</b> | 5.9941  | 6.1569  | 0.4932  | <b>H(542)</b> | -15.1636 | -4.8987 | -3.1201 |
| <b>H(194)</b> | 5.6604  | 4.4748  | 0.0674  | <b>H(543)</b> | -13.4784 | -4.4995 | -2.7084 |
| <b>C(195)</b> | 4.1615  | 5.8864  | -0.6487 | <b>C(544)</b> | -13.9364 | -7.1021 | -1.9527 |
| <b>H(196)</b> | 4.1198  | 6.923   | -1.0325 | <b>H(545)</b> | -12.9372 | -6.9266 | -2.4148 |
| <b>H(197)</b> | 3.7793  | 5.2462  | -1.4682 | <b>H(546)</b> | -14.6189 | -7.3925 | -2.7785 |
| <b>C(198)</b> | 3.2649  | 5.7472  | 0.5861  | <b>C(547)</b> | -12.3966 | 5.7274  | 0.8356  |
| <b>H(199)</b> | 3.6998  | 6.3026  | 1.4373  | <b>O(548)</b> | -11.5821 | 5.3268  | 1.6498  |
| <b>H(200)</b> | 3.2222  | 4.687   | 0.904   | <b>N(549)</b> | -13.7204 | 5.9068  | 1.1701  |
| <b>C(201)</b> | 1.856   | 6.2681  | 0.2812  | <b>H(550)</b> | -14.3315 | 6.4766  | 0.5673  |
| <b>H(202)</b> | 1.906   | 7.3226  | -0.0488 | <b>C(551)</b> | -14.1802 | 5.7334  | 2.5526  |
| <b>H(203)</b> | 1.4209  | 5.7063  | -0.5691 | <b>H(552)</b> | -13.3214 | 5.6044  | 3.2598  |
| <b>C(204)</b> | 0.9509  | 6.1444  | 1.5122  | <b>H(553)</b> | -14.749  | 4.7751  | 2.611   |
| <b>H(205)</b> | 1.4203  | 6.6378  | 2.383   | <b>C(554)</b> | -15.0461 | 6.9253  | 2.9956  |
| <b>H(206)</b> | 0.8452  | 5.0767  | 1.7881  | <b>H(555)</b> | -14.9566 | 7.7943  | 2.3118  |
| <b>C(207)</b> | -0.4212 | 6.7628  | 1.2277  | <b>H(556)</b> | -16.1107 | 6.6575  | 3.0999  |
| <b>H(208)</b> | -0.3432 | 7.859   | 1.1208  | <b>O(557)</b> | -14.5841 | 7.445   | 4.2319  |
| <b>H(209)</b> | -0.8066 | 6.3979  | 0.2542  | <b>H(558)</b> | -14.7088 | 6.7885  | 4.9483  |

|               |          |        |         |               |          |         |         |
|---------------|----------|--------|---------|---------------|----------|---------|---------|
| <b>C(210)</b> | -1.408   | 6.3994 | 2.352   | <b>C(559)</b> | -13.1155 | 1.3045  | -0.5372 |
| <b>H(211)</b> | -1.1254  | 6.9069 | 3.299   | <b>O(560)</b> | -12.0407 | 0.7437  | -0.5445 |
| <b>H(212)</b> | -1.3688  | 5.2983 | 2.5414  | <b>N(561)</b> | -13.7268 | 1.6793  | 0.668   |
| <b>N(213)</b> | -2.785   | 6.7671 | 2.009   | <b>H(562)</b> | -14.5961 | 2.2506  | 0.6021  |
| <b>C(214)</b> | -3.4595  | 6.0928 | 1.0478  | <b>C(563)</b> | -14.2592 | -3.1134 | -0.2994 |
| <b>H(215)</b> | -3.2479  | 7.5243 | 2.5045  | <b>O(564)</b> | -13.0424 | -3.2032 | -0.1881 |
| <b>O(216)</b> | -2.934   | 5.2048 | 0.3774  | <b>N(565)</b> | -15.0171 | -2.7324 | 0.7725  |
| <b>C(217)</b> | -4.9404  | 6.4313 | 0.858   | <b>H(566)</b> | -16.0395 | -2.8697 | 0.8171  |
| <b>C(218)</b> | -5.7558  | 5.3549 | 1.611   | <b>C(567)</b> | -12.8459 | 2.0599  | 1.7872  |
| <b>H(219)</b> | -5.2032  | 6.46   | -0.2285 | <b>H(568)</b> | -12.4441 | 3.0869  | 1.6095  |
| <b>C(220)</b> | -7.1309  | 5.1611 | 0.9465  | <b>H(569)</b> | -11.9648 | 1.3779  | 1.8277  |
| <b>H(221)</b> | -5.2091  | 4.3793 | 1.6333  | <b>C(570)</b> | -13.6369 | 2.0354  | 3.1083  |
| <b>C(222)</b> | -8.1642  | 4.5135 | 1.8902  | <b>H(571)</b> | -14.7277 | 2.1705  | 2.9577  |
| <b>H(223)</b> | -7.0065  | 4.5754 | -0.0044 | <b>H(572)</b> | -13.4648 | 1.109   | 3.6828  |
| <b>H(224)</b> | -8.6534  | 5.2712 | 2.5456  | <b>C(573)</b> | -14.3763 | -2.2707 | 2.0086  |
| <b>C(225)</b> | -9.1863  | 3.7113 | 1.0818  | <b>H(574)</b> | -13.3955 | -1.7849 | 1.7751  |
| <b>H(226)</b> | -8.729   | 2.8919 | 0.4982  | <b>H(575)</b> | -14.1546 | -3.1274 | 2.6842  |
| <b>H(227)</b> | -9.7564  | 4.3551 | 0.3828  | <b>C(576)</b> | -15.2869 | -1.2525 | 2.7067  |
| <b>O(228)</b> | -10.0406 | 3.0608 | 1.9991  | <b>H(577)</b> | -16.3386 | -1.5898 | 2.7924  |
| <b>H(229)</b> | -10.7448 | 3.705  | 2.2637  | <b>H(578)</b> | -14.9015 | -0.9834 | 3.7071  |
| <b>O(230)</b> | -7.4461  | 3.6248 | 2.7413  | <b>O(579)</b> | -13.2949 | 3.1455  | 3.91    |
| <b>H(231)</b> | -8.0685  | 2.9564 | 3.1316  | <b>H(580)</b> | -12.3292 | 3.1799  | 4.068   |
| <b>O(232)</b> | -7.6624  | 6.361  | 0.4786  | <b>O(581)</b> | -15.3715 | -0.0739 | 1.938   |
| <b>H(233)</b> | -7.7451  | 7.0363 | 1.2085  | <b>H(582)</b> | -14.4831 | 0.1878  | 1.5425  |
| <b>O(234)</b> | -5.8526  | 5.8413 | 2.9286  | <b>H(583)</b> | -13.9918 | 3.8954  | -0.815  |
| <b>H(235)</b> | -6.357   | 5.2036 | 3.4855  | <b>H(584)</b> | -14.2508 | -0.8542 | -0.8499 |
| <b>O(236)</b> | -5.1052  | 7.7314 | 1.3641  | <b>H(585)</b> | -13.7308 | -5.5567 | -0.4529 |
| <b>H(237)</b> | -5.9683  | 7.8245 | 1.8511  | <b>C(586)</b> | -15.8486 | -6.06   | -0.7635 |
| <b>C(238)</b> | 14.7582  | 5.8244 | -2.3229 | <b>O(587)</b> | -16.8028 | -6.2674 | -1.4788 |
| <b>C(239)</b> | 15.7763  | 4.6762 | -2.3844 | <b>N(588)</b> | -15.9595 | -6.1042 | 0.622   |
| <b>H(240)</b> | 14.9038  | 6.4491 | -1.4093 | <b>H(589)</b> | -15.2343 | -5.6595 | 1.2081  |
| <b>C(241)</b> | 17.1802  | 5.1487 | -1.9484 | <b>C(590)</b> | -16.1784 | -0.3654 | -1.7682 |
| <b>H(242)</b> | 15.4352  | 3.8388 | -1.72   | <b>O(591)</b> | -16.8535 | -0.0971 | -2.7395 |
| <b>C(243)</b> | 18.2658  | 4.1414 | -2.3864 | <b>N(592)</b> | -16.6966 | -0.2676 | -0.4873 |
| <b>H(244)</b> | 17.194   | 5.3057 | -0.8445 | <b>H(593)</b> | -16.1105 | -0.4443 | 0.3398  |
| <b>H(245)</b> | 18.4677  | 4.2127 | -3.4772 | <b>C(594)</b> | -14.0293 | 5.1317  | -2.6028 |
| <b>C(246)</b> | 19.5549  | 4.2599 | -1.5569 | <b>O(595)</b> | -13.6617 | 5.4086  | -3.7226 |
| <b>H(247)</b> | 19.3418  | 4.2907 | -0.4713 | <b>N(596)</b> | -15.0895 | 5.8095  | -2.0114 |
| <b>H(248)</b> | 20.1653  | 5.1322 | -1.8459 | <b>H(597)</b> | -15.3402 | 5.6291  | -1.0484 |
| <b>O(249)</b> | 20.393   | 3.1569 | -1.8217 | <b>C(598)</b> | -15.44   | 7.1446  | -2.5102 |
| <b>H(250)</b> | 19.8828  | 2.3135 | -1.7972 | <b>H(599)</b> | -14.5756 | 7.5985  | -3.0527 |
| <b>O(251)</b> | 14.8113  | 6.7052 | -3.419  | <b>H(600)</b> | -16.2614 | 7.0552  | -3.2559 |
| <b>H(252)</b> | 15.6369  | 6.5499 | -3.9448 | <b>C(601)</b> | -15.8639 | 8.0349  | -1.3293 |
| <b>O(253)</b> | 15.7539  | 4.2128 | -3.7161 | <b>H(602)</b> | -15.9933 | 9.0865  | -1.6381 |
| <b>H(254)</b> | 16.3411  | 3.4156 | -3.8112 | <b>H(603)</b> | -16.7884 | 7.6745  | -0.8399 |
| <b>O(255)</b> | 17.4133  | 6.3696 | -2.6149 | <b>O(604)</b> | -14.9055 | 7.9585  | -0.2992 |
| <b>H(256)</b> | 18.1386  | 6.8699 | -2.1929 | <b>H(605)</b> | -14.0537 | 8.4196  | -0.5408 |
| <b>O(257)</b> | 17.7198  | 2.8834 | -2.0737 | <b>C(606)</b> | -17.8553 | 0.5938  | -0.2596 |
| <b>H(258)</b> | 18.0049  | 2.1643 | -2.7136 | <b>H(607)</b> | -18.6119 | 0.4392  | -1.0657 |
| <b>C(259)</b> | 13.0728  | 2.1276 | 1.4133  | <b>H(608)</b> | -18.3348 | 0.2965  | 0.6992  |
| <b>O(260)</b> | 12.6927  | 1.3674 | 2.3039  | <b>C(609)</b> | -17.4318 | 2.0757  | -0.2192 |
| <b>N(261)</b> | 12.3742  | 2.2942 | 0.268   | <b>H(610)</b> | -16.9957 | 2.4066  | -1.1813 |
| <b>H(262)</b> | 12.6849  | 2.9281 | -0.4777 | <b>H(611)</b> | -18.274  | 2.7348  | 0.055   |
| <b>C(263)</b> | 11.0869  | 1.6152 | 0.083   | <b>O(612)</b> | -16.4167 | 2.319   | 0.7395  |

|               |          |         |         |               |          |          |         |
|---------------|----------|---------|---------|---------------|----------|----------|---------|
| <b>H(264)</b> | 11.1581  | 0.5709  | 0.476   | <b>H(613)</b> | -16.314  | 1.5568   | 1.3543  |
| <b>H(265)</b> | 10.8873  | 1.5475  | -1.0106 | <b>C(614)</b> | -17.287  | -6.1673  | 1.2335  |
| <b>C(266)</b> | 9.9465   | 2.3649  | 0.7989  | <b>H(615)</b> | -17.1837 | -6.6616  | 2.2271  |
| <b>H(267)</b> | 10.1442  | 2.3741  | 1.89    | <b>H(616)</b> | -17.9654 | -6.806   | 0.6183  |
| <b>H(268)</b> | 9.9301   | 3.4248  | 0.4884  | <b>C(617)</b> | -17.8871 | -4.7598  | 1.3845  |
| <b>C(269)</b> | 8.606    | 1.6887  | 0.4971  | <b>H(618)</b> | -18.0953 | -4.2909  | 0.403   |
| <b>H(270)</b> | 8.3909   | 1.746   | -0.5873 | <b>H(619)</b> | -18.8031 | -4.7628  | 2.0006  |
| <b>H(271)</b> | 8.6667   | 0.6084  | 0.7421  | <b>O(620)</b> | -16.9831 | -3.8708  | 2.0162  |
| <b>C(272)</b> | 7.4558   | 2.3259  | 1.2903  | <b>H(621)</b> | -16.2399 | -4.3467  | 2.4488  |
| <b>H(273)</b> | 7.414    | 3.4138  | 1.0992  | <b>C(622)</b> | -13.8378 | -8.2488  | -0.9359 |
| <b>H(274)</b> | 7.6399   | 2.2196  | 2.3756  | <b>H(623)</b> | -14.8637 | -8.4287  | -0.5236 |
| <b>C(275)</b> | 6.1206   | 1.6694  | 0.9125  | <b>C(624)</b> | -10.4865 | 7.8159   | 0.2297  |
| <b>H(276)</b> | 5.9208   | 1.8262  | -0.1648 | <b>H(625)</b> | -10.2226 | 7.3537   | 1.2209  |
| <b>H(277)</b> | 6.1895   | 0.5716  | 1.0509  | <b>C(626)</b> | -9.3416  | 8.7315   | -0.2281 |
| <b>C(278)</b> | 4.9526   | 2.2182  | 1.7445  | <b>H(627)</b> | -8.4648  | 8.108    | -0.5173 |
| <b>H(279)</b> | 4.9024   | 3.3188  | 1.6539  | <b>H(628)</b> | -9.638   | 9.2591   | -1.1597 |
| <b>H(280)</b> | 5.1214   | 2.0137  | 2.8174  | <b>C(629)</b> | -13.3298 | -9.5338  | -1.6037 |
| <b>C(281)</b> | 3.6292   | 1.5891  | 1.2868  | <b>H(630)</b> | -13.957  | -9.7648  | -2.4899 |
| <b>H(282)</b> | 3.4874   | 1.7724  | 0.2042  | <b>H(631)</b> | -12.2972 | -9.3805  | -1.9868 |
| <b>H(283)</b> | 3.6778   | 0.4879  | 1.4026  | <b>C(632)</b> | -8.9234  | 9.7712   | 0.8257  |
| <b>C(284)</b> | 2.4285   | 2.1392  | 2.0691  | <b>H(633)</b> | -9.6921  | 10.582   | 0.8547  |
| <b>H(285)</b> | 2.3785   | 3.2388  | 1.9613  | <b>C(634)</b> | -13.3463 | -10.7342 | -0.6378 |
| <b>H(286)</b> | 2.5591   | 1.9483  | 3.1494  | <b>H(635)</b> | -12.6075 | -10.5582 | 0.1819  |
| <b>C(287)</b> | 1.1226   | 1.4997  | 1.5743  | <b>C(636)</b> | -12.9854 | -12.0234 | -1.3692 |
| <b>H(288)</b> | 1.0627   | 1.582   | 0.4726  | <b>H(637)</b> | -12.962  | -12.8793 | -0.6839 |
| <b>H(289)</b> | 1.1291   | 0.4133  | 1.7924  | <b>H(638)</b> | -13.7248 | -12.2612 | -2.1486 |
| <b>C(290)</b> | -0.1074  | 2.1526  | 2.219   | <b>H(639)</b> | -12.0018 | -11.952  | -1.8483 |
| <b>H(291)</b> | -0.0868  | 3.2452  | 2.0422  | <b>C(640)</b> | -7.563   | 10.3674  | 0.4652  |
| <b>H(292)</b> | -0.0697  | 2.0221  | 3.3165  | <b>H(641)</b> | -7.2547  | 11.1382  | 1.1799  |
| <b>C(293)</b> | -1.4098  | 1.5592  | 1.6682  | <b>H(642)</b> | -6.7743  | 9.5945   | 0.4692  |
| <b>H(294)</b> | -1.4068  | 1.5672  | 0.5609  | <b>H(643)</b> | -7.5727  | 10.819   | -0.5327 |
| <b>H(295)</b> | -1.5131  | 0.4949  | 1.964   | <b>C(644)</b> | -12.8623 | -7.8442  | 0.1596  |
| <b>C(296)</b> | -2.6224  | 2.3535  | 2.1862  | <b>O(645)</b> | -11.6749 | -7.6854  | -0.038  |
| <b>H(297)</b> | -2.4407  | 3.4497  | 2.0876  | <b>N(646)</b> | -13.3915 | -7.7371  | 1.4388  |
| <b>H(298)</b> | -2.7828  | 2.1356  | 3.2666  | <b>H(647)</b> | -14.4184 | -7.7214  | 1.5793  |
| <b>N(299)</b> | -3.8491  | 2.0442  | 1.4394  | <b>C(648)</b> | -14.7617 | -10.8555 | -0.0913 |
| <b>C(300)</b> | -4.5809  | 0.9409  | 1.7501  | <b>O(649)</b> | -15.6996 | -11.289  | -0.7207 |
| <b>H(301)</b> | -4.0458  | 2.6331  | 0.6122  | <b>N(650)</b> | -14.9476 | -10.4027 | 1.2178  |
| <b>O(302)</b> | -4.2167  | 0.114   | 2.5761  | <b>H(651)</b> | -14.2035 | -9.8879  | 1.6759  |
| <b>C(303)</b> | -5.93    | 0.7672  | 1.04    | <b>C(652)</b> | -11.7426 | 8.6583   | 0.3413  |
| <b>C(304)</b> | -6.9153  | -0.0617 | 1.8917  | <b>O(653)</b> | -12.3364 | 9.1336   | -0.6201 |
| <b>H(305)</b> | -5.765   | 0.3233  | 0.0229  | <b>N(654)</b> | -12.2093 | 8.8612   | 1.6129  |
| <b>C(306)</b> | -8.0941  | -0.5572 | 1.0381  | <b>H(655)</b> | -11.76   | 8.4158   | 2.435   |
| <b>H(307)</b> | -6.404   | -0.9187 | 2.3921  | <b>C(656)</b> | -8.7875  | 9.1206   | 2.1962  |
| <b>C(308)</b> | -9.1194  | -1.3671 | 1.8645  | <b>O(657)</b> | -7.9374  | 8.2727   | 2.4443  |
| <b>H(309)</b> | -7.7242  | -1.1713 | 0.1744  | <b>N(658)</b> | -9.6456  | 9.5507   | 3.1708  |
| <b>H(310)</b> | -9.5763  | -0.7679 | 2.6799  | <b>H(659)</b> | -10.3977 | 10.2243  | 2.9692  |
| <b>C(311)</b> | -10.1619 | -1.948  | 0.9055  | <b>C(660)</b> | -13.2327 | 9.8641   | 1.887   |
| <b>H(312)</b> | -9.7306  | -2.7073 | 0.2224  | <b>H(661)</b> | -14.0836 | 9.7657   | 1.1714  |
| <b>H(313)</b> | -10.6566 | -1.1558 | 0.3096  | <b>H(662)</b> | -13.6387 | 9.6895   | 2.9129  |
| <b>O(314)</b> | -11.1363 | -2.5924 | 1.7143  | <b>C(663)</b> | -12.6471 | 11.2836  | 1.7776  |
| <b>H(315)</b> | -11.886  | -2.8678 | 1.1143  | <b>H(664)</b> | -13.4338 | 12.0522  | 1.8538  |
| <b>O(316)</b> | -8.3625  | -2.4012 | 2.4638  | <b>H(665)</b> | -12.0684 | 11.4169  | 0.8443  |
| <b>H(317)</b> | -8.9428  | -3.1655 | 2.687   | <b>C(666)</b> | -16.3127 | -10.0097 | 1.5958  |

|               |         |         |         |               |          |          |        |
|---------------|---------|---------|---------|---------------|----------|----------|--------|
| <b>O(318)</b> | -8.7743 | 0.495   | 0.4065  | <b>H(667)</b> | -16.9784 | -10.9035 | 1.5297 |
| <b>H(319)</b> | -9.0934 | 1.1679  | 1.0586  | <b>H(668)</b> | -16.7184 | -9.2663  | 0.8686 |
| <b>O(320)</b> | -7.4617 | 0.79    | 2.8824  | <b>C(669)</b> | -16.3204 | -9.4282  | 3.0165 |
| <b>H(321)</b> | -6.8841 | 0.7801  | 3.6758  | <b>H(670)</b> | -17.2592 | -8.8843  | 3.229  |
| <b>O(322)</b> | -6.4892 | 2.0199  | 0.775   | <b>H(671)</b> | -16.1549 | -10.1989 | 3.7878 |
| <b>H(323)</b> | -6.7854 | 2.4925  | 1.6131  | <b>C(672)</b> | -9.7244  | 8.8548   | 4.4608 |
| <b>C(324)</b> | 14.3889 | 2.8808  | 1.6085  | <b>H(673)</b> | -9.1248  | 9.4109   | 5.2151 |
| <b>C(325)</b> | 15.5447 | 2.0687  | 0.9712  | <b>H(674)</b> | -9.2782  | 7.8304   | 4.3843 |
| <b>H(326)</b> | 14.5612 | 3.0473  | 2.7011  | <b>C(675)</b> | -11.1909 | 8.7404   | 4.9145 |
| <b>C(327)</b> | 16.9016 | 2.4951  | 1.5619  | <b>H(676)</b> | -11.2613 | 8.408    | 5.9649 |
| <b>H(328)</b> | 15.3821 | 0.9689  | 1.0962  | <b>H(677)</b> | -11.7533 | 9.6829   | 4.7815 |
| <b>C(329)</b> | 18.0874 | 1.9013  | 0.7756  | <b>C(678)</b> | -12.6255 | -7.0701  | 2.4955 |
| <b>H(330)</b> | 16.9537 | 2.2264  | 2.6408  | <b>H(679)</b> | -12.7717 | -7.6277  | 3.4469 |
| <b>H(331)</b> | 18.0582 | 2.2635  | -0.284  | <b>H(680)</b> | -11.5256 | -7.1095  | 2.2848 |
| <b>C(332)</b> | 19.4577 | 2.2374  | 1.3923  | <b>C(681)</b> | -13.0692 | -5.6105  | 2.6544 |
| <b>H(333)</b> | 19.4294 | 3.1598  | 1.9963  | <b>H(682)</b> | -12.5943 | -5.127   | 3.5284 |
| <b>H(334)</b> | 20.2374 | 2.3392  | 0.6088  | <b>H(683)</b> | -12.8764 | -5.0036  | 1.7466 |
| <b>O(335)</b> | 19.8986 | 1.1369  | 2.1481  | <b>O(684)</b> | -14.4801 | -5.5308  | 2.8423 |
| <b>H(336)</b> | 19.7108 | 1.2522  | 3.1129  | <b>H(685)</b> | -14.8404 | -6.3635  | 3.2145 |
| <b>O(337)</b> | 14.3373 | 4.1817  | 1.0921  | <b>O(686)</b> | -15.3114 | -8.4297  | 3.11   |
| <b>H(338)</b> | 14.0089 | 4.1987  | 0.1521  | <b>H(687)</b> | -14.4917 | -8.8091  | 3.4938 |
| <b>O(339)</b> | 15.417  | 2.2991  | -0.4064 | <b>O(688)</b> | -11.7611 | 11.4096  | 2.8853 |
| <b>H(340)</b> | 16.2826 | 2.4725  | -0.8482 | <b>H(689)</b> | -11.4509 | 12.3304  | 2.9777 |
| <b>O(341)</b> | 17.1125 | 3.8908  | 1.4583  | <b>O(690)</b> | -11.7461 | 7.7332   | 4.0869 |
| <b>H(342)</b> | 16.2488 | 4.3604  | 1.3626  | <b>H(691)</b> | -12.7269 | 7.6657   | 4.1952 |
| <b>O(343)</b> | 17.8746 | 0.5079  | 0.677   |               |          |          |        |
| <b>H(344)</b> | 18.596  | 0.0114  | 1.1459  |               |          |          |        |
| <b>C(345)</b> | 13.1604 | -1.7585 | 3.9509  |               |          |          |        |
| <b>O(346)</b> | 12.7127 | -2.7524 | 4.5088  |               |          |          |        |
| <b>N(347)</b> | 12.7239 | -1.2961 | 2.7512  |               |          |          |        |
| <b>H(348)</b> | 13.0445 | -0.3929 | 2.3811  |               |          |          |        |
| <b>C(349)</b> | 11.4987 | -1.8419 | 2.1667  |               |          |          |        |

---
